# Supplementary material
Source: PubMed Central journal article supplement (PMC7061059)

435  
436  
437  
438  
439  
440  
441  
442  
443  
444  
445  
446  
447  
448  
449  
450  
451  
452  
453  
454  
455  
456  
457

**Supplemental Figure 1.** Timing of disease recurrence according to (A) type and (B) site.

Journal Pre-proof

477 **Supplemental Table 1.** Time to recurrence by all patients (multivariable analysis).

|                             | # Recurrence |     | 5-Year recurrence free survival (SE) | MVA after model selection  |        |           |
|-----------------------------|--------------|-----|--------------------------------------|----------------------------|--------|-----------|
|                             | No           | Yes |                                      | HR (95% CI)                | p      | Overall p |
| <b>Gender</b>               |              |     |                                      |                            |        |           |
| Male                        | 525          | 234 | 0.60 (0.02)                          | removed in model selection |        |           |
| Female                      | 559          | 232 | 0.63 (0.02)                          |                            |        |           |
| <b>Age at Dx</b>            |              |     |                                      |                            |        |           |
| <= 65                       | 495          | 261 | 0.58 (0.02)                          | removed in model selection |        |           |
| >= 66                       | 589          | 205 | 0.66 (0.02)                          |                            |        |           |
| <b>Race</b>                 |              |     |                                      |                            |        |           |
| Caucasian                   | 808          | 354 | 0.61 (0.02)                          | Reference                  |        |           |
| African American            | 182          | 59  | 0.69 (0.04)                          | 0.66 (0.49 - 0.90)         | 0.01   | 0.001     |
| Other                       | 94           | 53  | 0.55 (0.05)                          | 1.26 (0.925 - 1.71)        | 0.14   |           |
| <b>TNM stage</b>            |              |     |                                      |                            |        |           |
| 1                           | 650          | 181 | 0.71 (0.02)                          | Reference                  |        |           |
| 2                           | 168          | 79  | 0.57 (0.04)                          | 1.35 (1.003 - 1.82)        | 0.05   | 0.03      |
| 3                           | 214          | 136 | 0.51 (0.03)                          | 1.45 (1.091 - 1.93)        | 0.01   |           |
| <b>Histology</b>            |              |     |                                      |                            |        |           |
| Small cell                  | 38           | 43  | 0.398 (0.06)                         | 1.63 (1.092 - 2.44)        | 0.02   | 0.02      |
| Other                       | 1046         | 423 | 0.63 (0.012)                         | Reference                  |        |           |
| <b>Primary treatment</b>    |              |     |                                      |                            |        |           |
| Local therapy alone         | 741          | 202 | 0.72 (0.02)                          | 0.62 (0.475 - 0.80)        | <0.001 | <0.001    |
| Systemic treatment included | 343          | 264 | 0.48 (0.02)                          | Reference                  |        |           |

478

479

480 **Supplemental Table 2.** Time to recurrence (multivariable analysis—recurrence cases only).

|                                 | # Recurrence |     | 2-Year recurrence-free survival (SE) | MVA after model selection  |          |                  |
|---------------------------------|--------------|-----|--------------------------------------|----------------------------|----------|------------------|
|                                 | No           | Yes |                                      | HR (95% CI)                | <i>p</i> | Overall <i>p</i> |
| <b>Gender</b>                   |              |     |                                      |                            |          |                  |
| Male                            | ****         | 232 | 0.32 (0.03)                          | not used in MVA            |          |                  |
| Female                          | ****         | 229 | 0.31 (0.03)                          |                            |          |                  |
| <b>Age at Dx</b>                |              |     |                                      |                            |          |                  |
| <= 65                           | ****         | 259 | 0.35 (0.03)                          | 0.82 (0.67 – 1.0)          | 0.05     | 0.05             |
| >= 66                           | ****         | 202 | 0.28 (0.03)                          | Reference                  |          |                  |
| <b>Race</b>                     |              |     |                                      |                            |          |                  |
| Caucasian                       | ****         | 351 | 0.31 (0.03)                          | not used in MVA            |          |                  |
| Non-Caucasian                   | ****         | 110 | 0.35 (0.05)                          |                            |          |                  |
| <b>TNM stage</b>                |              |     |                                      |                            |          |                  |
| 1                               | ****         | 178 | 0.39 (0.04)                          | Reference                  |          |                  |
| 2,3                             | ****         | 213 | 0.24 (0.03)                          |                            |          |                  |
| <b>Histology</b>                |              |     |                                      |                            |          |                  |
| Small cell                      | ****         | 42  | 0.14 (0.05)                          | removed in model selection |          |                  |
| Other                           | ****         | 419 | 0.33 (0.02)                          |                            |          |                  |
| <b>Primary treatment</b>        |              |     |                                      |                            |          |                  |
| S, SR, R                        | ****         | 201 | 0.36 (0.03)                          | removed in model selection |          |                  |
| SC, C, CR, SCR                  | ****         | 260 | 0.28 (0.03)                          |                            |          |                  |
| <b>Type of first recurrence</b> |              |     |                                      |                            |          |                  |
| Local                           | ****         | 106 | 0.43 (0.05)                          | removed in model selection |          |                  |
| Regional                        | ****         | 99  | 0.30 (0.05)                          |                            |          |                  |
| Distant                         | ****         | 256 | 0.27 (0.03)                          |                            |          |                  |

481

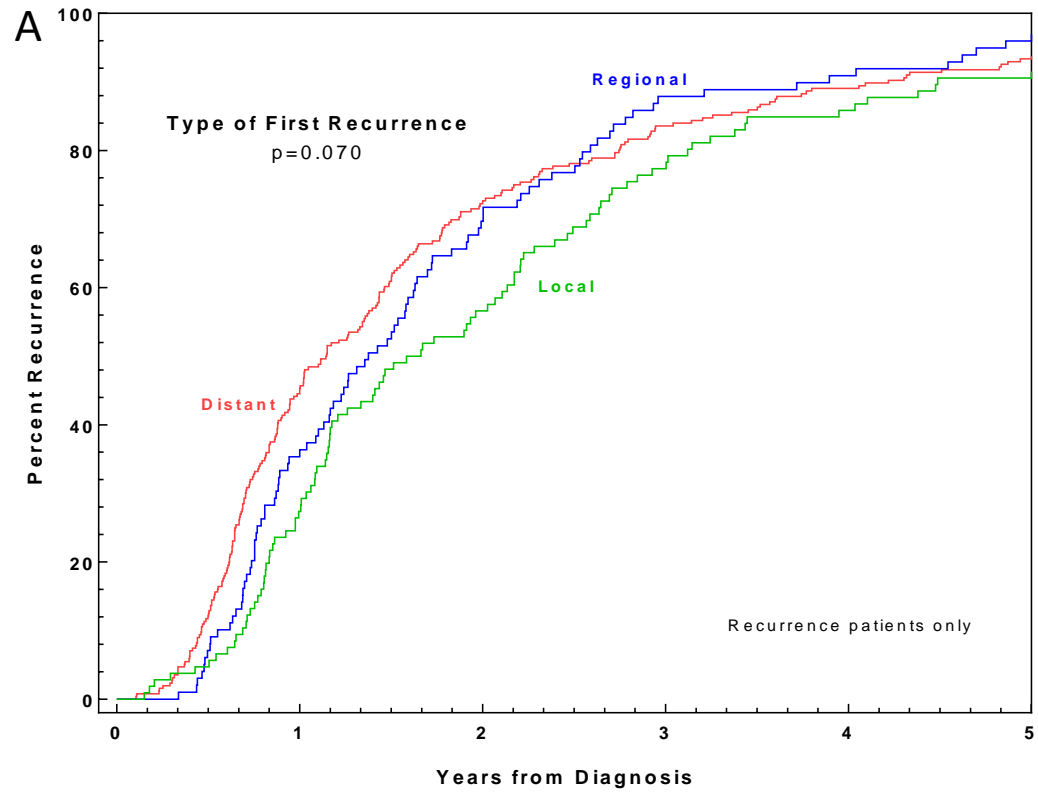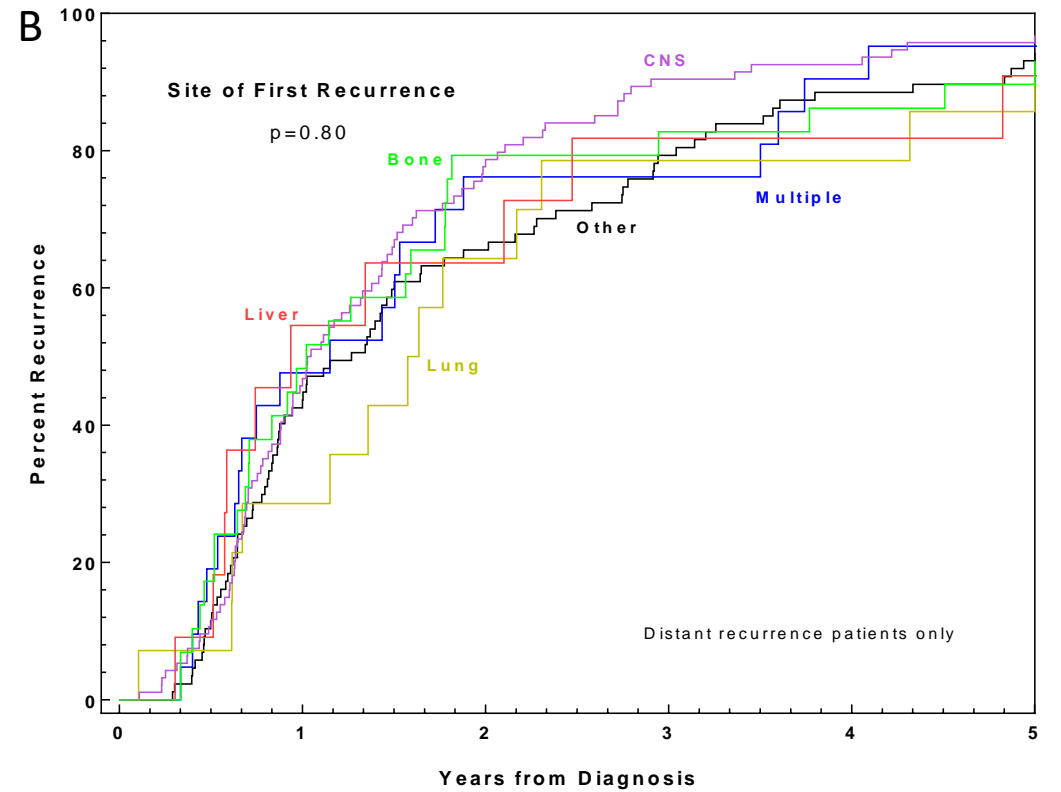

Supplement: NIHMS1547118-supplement-1.pdf [file NIHMS1547118-supplement-1.pdf]
